# Supplementary material for: The effects of C by N replacement on the hydrogen bonding of malonaldehyde: N-formylformimidic acid, N-(hydroxymethyl)formamide and related compounds
Source: Royal Society of Chemistry journal article supplement (doi:10.1039/b815827d), 2008-12-02
Supplement: b815827d.pdf [file b815827d.pdf]

**The effects of C by N replacement on the hydrogen bonding of  
malonaldehyde: *N*-formylformimidic acid, *N*-  
(hydroxymethyl)formamide and related compounds.**

**Pablo Sanz, Otilia Mó, Manuel Yáñez, and José Elguero**

*Contribution from Departamento de Química, C-9, Universidad Autónoma de Madrid,  
Cantoblanco, 28049-Madrid, Spain. Instituto de Química Médica, CSIC, Juan de la  
Cierva 3, E-28006 Madrid, Spain*

**Supporting Information (A total of 2 pages)**

Table S1. Calculated proton affinities (PA,  $\text{kJ mol}^{-1}$ ) and gas phase acidities ( $\Delta_{\text{acid}}H^0$ ,  $\text{kJ mol}^{-1}$ ) of the compounds included in Scheme 5.

| Compound                    | PA  | $\Delta_{\text{acid}}H^0$ |
|-----------------------------|-----|---------------------------|
| Acrylaldehyde               | 804 |                           |
| N-methyleneformamide        | 825 |                           |
| (Z)-prop-1-en-1-ol          |     | 1481                      |
| (Z)-N-Methylformimidic acid |     | 1436                      |
